# Supplementary material for: Knowledge, attitudes and practices of South Asian immigrants in developed countries regarding oral cancer: an integrative review
Source: Springer Nature journal article supplement (doi:10.1186/s12885-020-06944-9), 2020-05-27
Supplement: MOESM1 [file 18020712]

Database: Ovid MEDLINE(R) ALL

Search Strategy:

---

- 1 Mouth Neoplasms.mp. or Mouth Neoplasms/ (34703)
- 2 "oral cancer".mp. (12360)
- 3 ("oral cancer" or "mouth cancer" or "mouth neoplasms" or "oral tumours").mp.  
[mp=title, abstract, original title, name of substance word, subject heading word,  
floating sub-heading word, keyword heading word, organism supplementary  
concept word, protocol supplementary concept word, rare disease supplementary  
concept word, unique identifier, synonyms] (38760)
- 4 Asians.mp. (15275)
- 5 "south asian".mp. (4978)
- 6 Immigrants.mp. or "Emigrants and Immigrants"/ (23679)
- 7 ("India" or "Pakistan" or "Sri Lanka" or "Nepal" or "Bangladesh").mp. [mp=title,  
abstract, original title, name of substance word, subject heading word, floating sub-  
heading word, keyword heading word, organism supplementary concept word,  
protocol supplementary concept word, rare disease supplementary concept word,  
unique identifier, synonyms] (195391)
- 8 Oropharyngeal cancer.mp. or Oropharyngeal Neoplasms/ (6840)
- 9 Mouth Neoplasms/ or Oropharyngeal Neoplasms/ or Oropharyngeal  
tumours.mp. (38832)
- 10 1 or 2 or 3 or 8 or 9 (43864)
- 11 4 or 5 or 7 (212154)
- 12 6 and 11 (1568)
- 13 10 and 12 (15)
